# Supplementary material for: Bit-Related Lesions in Event Horses After a Cross-Country Test
Source: PubMed Central journal article supplement (PMC8044447; doi:10.3389/fvets.2021.651160), 2021-03-31
Supplement: Data_Sheet_2.pdf [file Data_Sheet_2.pdf]

**The following bit types were considered to have a leverage effect:**

Baucher

Bombers 2½ ring

B-ring

Gag

Kimblewick

Neue Schule Jumpers Choice

Neue Schule Tranz Universal

Olympia

Pelham

Pessoa

Neue Schule Turtle Top Beval

Sprenger Dynamic RS Multiring

Stubben Golden Wing

Tom Thumb Butterfly

**The following double-jointed bit types with distinctive designs were considered to be formed:**

Bombers Colin Miles

Bombers Elliptical Roller

Happymouth

Neue Schule Turtle Tactio

Neue Schule Turtle Top

Rotary bit

Sprenger Dynamic RS

Sprenger KK Ultra

Sprenger Novocontact

Stubben Golden Wing
